# Supplementary material
Source: Research Square preprint supplement (doi:10.21203/rs.3.rs-9962169/v1)
Supplement: Supplementary file 1 [file c0579c763525ac0a57c24c44.docx]

**Extended Data**

**Extended Data Table 1. Grid water intensity by technology and generation mix**

| **Technology** | **L kWh⁻¹** | **US share** | **US contrib.** | **CA share** | **CA contrib.** |
| --- | --- | --- | --- | --- | --- |
| Natural gas (CCGT) | 0.776 | 43% | 0.334 | 35.4% | 0.275 |
| Nuclear | 2.544 | 19% | 0.483 | 8.5% | 0.216 |
| Coal | 2.600 | 16% | 0.416 | 0.1% | 0.003 |
| Wind | 0.004 | 10% | 0.000 | 7.9% | 0.000 |
| Solar PV | 0.098 | 4% | 0.004 | 26.8% | 0.026 |
| Geothermal (CA) | 4.163 | — | — | 5.2% | 0.217 |
| Biomass | 2.093 | 1% | 0.021 | 2.1% | 0.044 |
| Hydro (reservoir evap.) | 17.033 | 6% | (+1.022) | 13.4% | (+2.282) |
| Weighted avg — excl. hydro |  |  | 1.266 |  | 0.785 |
| Weighted avg — incl. hydro |  |  | 2.288 |  | 3.068 |

*Technology water consumption factors from Macknick et al.11, converted via 1 gal MWh⁻¹ = 0.003785 L kWh⁻¹, weighted by 2023 EIA12 and 2025 CAISO13 mixes.*

**Extended Data Table 2. Full AI water scenario matrix**

| **Scenario** | **WUE** | **Grid**  **(L kWh⁻¹)** | | **Total**  **(L kWh⁻¹)** | **Text**  **1 min (mL)** | **Image generate (mL)** | **Human ÷ text** | **Human ÷ image** |
| --- | --- | --- | --- | --- | --- | --- | --- | --- |
| Zero evap. + CA excl. | 0.000 | 0.785 | 0.785 | | 1.18 | 2.28 | ~1,925,000× | ~995,000× |
| WUE 0.2 + CA excl. | 0.200 | 0.785 | 0.985 | | 1.48 | 2.86 | ~1,534,000× | ~793,000× |
| WUE 0.2 + US excl. | 0.200 | 1.266 | 1.466 | | 2.20 | 4.26 | ~1,032,000× | ~533,000× |
| WUE 1.0 + CA excl. | 1.000 | 0.785 | 1.785 | | 2.68 | 5.19 | ~848,000× | ~438,000× |
| WUE 1.8 + CA excl. * | 1.800 | 0.785 | 2.585 | | 3.88 | 7.52 | ~585,000× | ~302,000× |
| WUE 1.8 + US excl. * | 1.800 | 1.266 | 3.066 | | 4.60 | 8.91 | ~494,000× | ~255,000× |
| WUE 1.8 + US incl. hydro | 1.800 | 2.288 | 4.088 | | 6.13 | 11.88 | ~370,000× | ~191,000× |
| WUE 9.0 + US incl. hydro | 9.000 | 2.288 | 11.288 | | 16.93 | 32.81 | ~134,000× | ~69,000× |
| Li et al.⁴ V100 † | ~1.8 | ~2.0 | ~3.8 eff. | | 11,678 | n/a | ~194× | n/a |

*Formula: water = energy (kWh) × (WUE + grid intensity). Human benchmark: 2,271 L per 100-min task (7,786 L day⁻¹; ref. 7).*

** Most representative for current hyperscale data centres. † V100-era hardware; comprehensive scope upper bound.*

**Extended Data Table 3. Human-to-AI energy ratio sensitivity to productivity ratio**

| **Productivity ratio (human:AI)** | **Human energy (Wh)** | **vs. Text AI**  **(1.5 Wh)** | **vs. Image AI**  **(2.907 Wh)** |
| --- | --- | --- | --- |
| 1:1 | 467 | 311× | 161× |
| 6:1 | 2,802 | 1,868× | 964× |
| 10:1 | 4,670 | 3,113× | 1,606× |
| 100:1 (study baseline) | 46,700 | 31,133× | ~16,065× |
| 500:1 | 233,500 | 155,667× | ~80,300× |
| 1,000:1 | 467,000 | 311,333× | ~160,600× |
| 10,000:1 | 4,670,000 | 3,113,333× | ~1,606,000× |
