# Supplementary material
Source: Research Square preprint supplement (doi:10.21203/rs.3.rs-9962169/v1)
Supplement: Supplementary file 2 [file fb4959722dd9084d3fa5267a.docx]

**Supplementary Information**

*Per-task energy and water demands of artificial intelligence inference are orders of magnitude lower than human labor across all scenarios*

This Supplementary Information provides complete derivations supporting all quantitative claims in the main text.

*Table S1 | Sector-decomposed energy budget for a representative US working adult.*

| **Sector** | **Continuous W** | **Annual kWh** | **Derivation** |
| --- | --- | --- | --- |
| Personal vehicle | 1,563 | 13,690 | 20,921 km yr⁻¹ ÷ 7.35 L/100 km × 9.47 kWh L⁻¹ (gasoline) |
| Air travel | 1,553 | 13,600 | 32,187 passenger-km yr⁻¹ × 0.42 kWh km⁻¹ |
| Food system | 1,200 | 10,512 | ~16% US primary energy per capita; ref. 6 |
| Consumer goods | 850 | 7,446 | Embodied energy in manufactured goods |
| Home natural gas | 803 | 7,032 | 240 therms yr⁻¹ × 29.3 kWh therm⁻¹ |
| Home electricity | 548 | 4,800 | 400 kWh person⁻¹ month⁻¹; above CA per-capita avg (~186 kWh person⁻¹ month⁻¹ = 503 kWh household⁻¹ ÷ 2.7 persons; EIA Table 5A) |
| Water and infrastructure | 150 | 1,314 | Municipal water, wastewater, solid waste |
| Total | 6,666 | 58,394 | 467 Wh per working minute; ~28 kW effective rate |

*Watts = annual kWh ÷ 8,760 h. Working-minute allocation: 6,666 W × 168 h week⁻¹ ÷ 2,400 min week⁻¹ = 466.6 Wh min⁻¹.*

***Supplementary Note 1 — Human Energy Budget***

6,666 W × 168 h week⁻¹ = 1,119,888 Wh week⁻¹ ÷ 2,400 min = 466.6 Wh min⁻¹. Vehicle: 13,000 miles yr⁻¹ ÷ 32 MPG = 406 gal × 33.7 kWh gal⁻¹ = 13,691 kWh yr⁻¹ ÷ 8,760 = 1,563 W. Aviation: 20,000 passenger-miles × 0.68 kWh mile⁻¹ = 13,600 kWh ÷ 8,760 = 1,553 W. Gas: 240 × 29.3 = 7,032 kWh ÷ 8,760 = 803 W. Electricity: 4,800 kWh yr⁻¹ ÷ 8,760 = 548 W.

***Supplementary Note 2 — Human Water Footprint***

Primary source (peer-reviewed): Hoekstra and Mekonnen (2012) ref. 8.

US per-capita WF: 2,842 m³ yr⁻¹ = 2,842,000 L yr⁻¹ ÷ 365 = 7,786 L day⁻¹.

Secondary source (not peer-reviewed): Water Footprint Network calculator ref. 9.

6,821 L day⁻¹ based on more recent US-specific data. Difference: 14%.

Per working minute (PNAS baseline): 7,786 L day⁻¹ × 7 days = 54,502 L week⁻¹ ÷ 2,400 min = 22.71 L min⁻¹. Per 100-min task: 22.71 × 100 = 2,271 L.

If WFN calculator figure is used instead: 6,821 × 7 ÷ 2,400 = 19.89 L min⁻¹; 100-min task = 1,989 L — all ratios reduce by 12.4%, remaining of the same order of magnitude.

***Supplementary Note 3 — AI Water Calculations and Validation***

Text AI (1 min): 0.0015 kWh × (1.8 + 1.266) = 0.0015 × 3.066 = 4.60 mL. Image gen per image: 0.002907 kWh × 3.066 L kWh⁻¹ = 0.008913 L = 8.91 mL (2.907 Wh per image; 2.907 kWh per 1,000 images; Luccioni et al. ref. 3). Iowa validation 21: 240 MW × 1.8 L kWh⁻¹ × 8,760 h = 3.784 billion L yr⁻¹ ≈ 3.8 billion L (error 0.5%), confirming the WUE methodology.
